# Supplementary material
Source: Springer Nature journal article supplement (https://www.springermedizin.de/resource/supplementary/12974_2009_206_MOESM4_ESM.pdf/9600994)

## MTT assay (96hr)

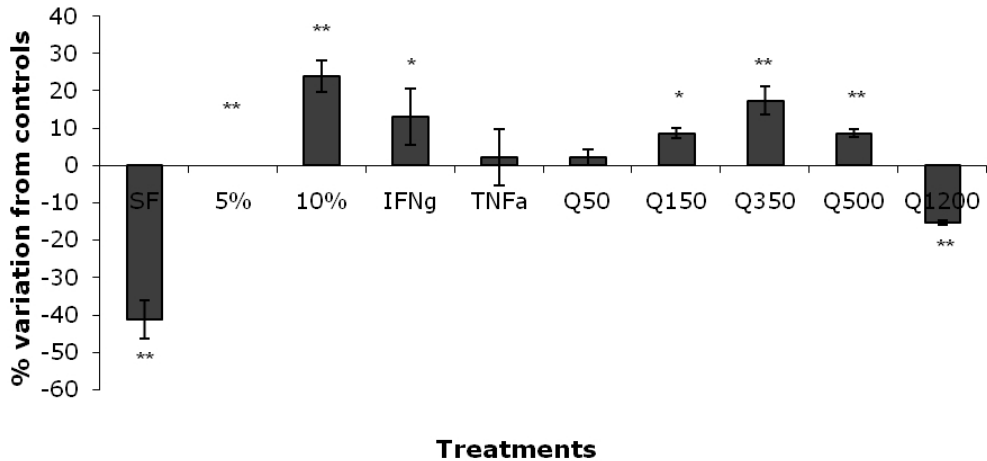

Supplement: MOESM4 [file 9600994]
